# Supplementary material for: Selection and Characterization of Rupintrivir-Resistant Norwalk Virus Replicon Cells In Vitro
Source: PubMed Central journal article supplement (PMC5923142; doi:10.1128/aac.00201-18), 2018-04-26
Supplement: AAC.00201-18_zac005187162s1.pdf [file AAC.00201-18_zac005187162s1.pdf]

**Table S1. Sequence of primers used for generation of FRET assay constructs in QuikChange site-directed mutagenesis method**

| Genogroup | Mutation site in NS6 | Forward primer (5'-3')            | Reverse primer (5'-3')            |
|-----------|----------------------|-----------------------------------|-----------------------------------|
| GI        | A105V                | TATGGGGGCTATTGTCTCCATGAGGATAC     | GTATCCTCATGGAGACAATAGCCCCATA      |
|           | I109V                | TTGCCTCCATGAGGGTACAGGGTCGGCTT     | AAGCCGACCCTGTACCCTCATGGAGGCAA     |
|           | A105V/I109V          | GGGCTATTGTCTCCATGAGGGTACAGGGTCGGC | GCCGACCCTGTACCCTCATGGAGACAATAGCCC |
| GII       | A105V                | AATGGGGACCCATGTAACCATGAAAATCC     | GGATTTTCATGGTTACATGGGTCCCCATT     |
|           | I109V                | ATGCAACCATGAAAGTCCAAGGGCGCACT     | AGTGCGCCCTTGGACTTTCATGGTTGCAT     |
|           | A105V/I109V          | GGACCCATGTAACCATGAAAGTCCAAGGGCGCA | TGCGCCCTTGGACTTTCATGGTTACATGGGTCC |
| GV        | A105V                | GATGGGTTACAGGTCGCCATCAAGATTG      | CAATCTTGATGGCGACCTGTGAACCCATC     |
|           | I109V                | AGGCCGCCATCAAGGTTGGTAGTGCCGTT     | AACGGCACTACCAACCTTGATGGCGGCCT     |
|           | A105V/I109V          | GTTACAGGTCGCCATCAAGGTTGGTAGTGCCG  | CGGCACTACCAACCTTGATGGCGACCTGTGAAC |

**Table S2. Sequence of primers used for generation of mutant MNV plasmid in two-step PCR mutagenesis method**

| Mutation site in NS6 | Name                          | Forward primer (5'-3') | Name                                | Reverse primer (5'-3') |                                     |
|----------------------|-------------------------------|------------------------|-------------------------------------|------------------------|-------------------------------------|
| 1st PCR              | A105V                         | MNV/2392F              | GTGTCAGAAGGATAAAGGAGGCCCGCCTCCGCTGC | A105V_R                | CAATCTTGATGGCGACCTGTGAACCCATC       |
|                      |                               | A105V_F                | GATGGGTTACAGGTCGCCATCAAGATTG        | MNV/3734R              | CGCGTGGTTCTGAATAGGGCTTAAGCTGATCTCGC |
|                      | I109V                         | MNV/2392F              | GTGTCAGAAGGATAAAGGAGGCCCGCCTCCGCTGC | I109V_R                | AACGGCACTACCAACCTTGATGGCGGCCT       |
|                      |                               | I109V_F                | AGGCCGCCATCAAGGTTGGTAGTGCCGTT       | MNV/3734R              | CGCGTGGTTCTGAATAGGGCTTAAGCTGATCTCGC |
|                      | A105V/I109V                   | MNV/2392F              | GTGTCAGAAGGATAAAGGAGGCCCGCCTCCGCTGC | A105V/I109V_R          | CGGCACTACCAACCTTGATGGCGACCTGTGAAC   |
|                      |                               | A105V/I109V_F          | GTTACAGGTCGCCATCAAGGTTGGTAGTGCCG    | MNV/3734R              | CGCGTGGTTCTGAATAGGGCTTAAGCTGATCTCGC |
| 2nd PCR              | A105V<br>I109V<br>A105V/I109V | MNV/2392F              | GTGTCAGAAGGATAAAGGAGGCCCGCCTCCGCTGC | MNV/3734R              | CGCGTGGTTCTGAATAGGGCTTAAGCTGATCTCGC |

**Table S3. Sequence of primers used for PCR and sequencing**

| Name     | Forward primer (5'-3')    | Name     | Reverse primer (5'-3')    |
|----------|---------------------------|----------|---------------------------|
| NV/1001F | TTGGTGTGCGGCCATTTAAAGATC  | NV/3500R | TCAAGGACCATACCTGTCAAGTCAG |
| NV/2001F | TTGTCAACCTCGGGCCTGTTTGCCG | NV/4001R | GTTGTAGGGATGGGCCATTCTGTAC |
| NV/2501F | GCCAGTGTACAAATCAAAGAAGACA |          |                           |
| NV/3501F | CTGACTTGACAGGTATGGTCCTTGA |          |                           |
